# Supplementary material
Source: Preprints.org preprint supplement (doi:10.20944/preprints202005.0517.v1)
Supplement: Supplementary file 1 [file supplementary]

**Supplement 1** | Designated scores to responses provided by participants to questions intended to measure overall adherence of the Saudi population to the home-stay strategy during the COVID-19 pandemic.

| Questions                                                                               | Choices [score]                                                                                                                                                                                                                                                                 |
|-----------------------------------------------------------------------------------------|---------------------------------------------------------------------------------------------------------------------------------------------------------------------------------------------------------------------------------------------------------------------------------|
| Do you leave home during the home-stay period?                                          | A. No [1]<br>B. Yes [0]<br>C. Yes, but I have stayed home since the application of the curfew. [0.5]                                                                                                                                                                            |
| What is your main reason for leaving home?                                              | A. I never left home [1]<br>B. Purchasing necessities [0.5]<br>C. Buying a meal [0]<br>D. Meeting with friends [0]<br>E. Going to work or hospital [0.5]<br>F. Having fun and leisure time [0]<br>G. Not taking any restrictions as there are no confirmed cases in my area [0] |
| How many days do you leave home per week during the pandemic of COVID-19?               | A. I never left home [1]<br>B. One day [0.75]<br>C. Two to three days [0.5]<br>D. Four to five days [0.25]<br>E. More than six days [0]                                                                                                                                         |
| Approximately, how much time per day do you spend outside during the COVID-19 pandemic? | A. I never left home [1]<br>B. Less than one hour [0.5]<br>C. Between one and two hours [0.25]<br>D. More than two hours [0]<br>E. Other [0]                                                                                                                                    |
| Who joins you when you leave home?                                                      | A. I never left home [1]<br>B. No one [0.5]<br>C. Adult [0.25]<br>D. Child [0]<br>E. Whoever wants to join [0]                                                                                                                                                                  |

**Supplement 2|** Demographic characteristics of the participants in this study (n = 5105).

| Demographic characteristics |                              | Number of participants<br>(% of participants) |
|-----------------------------|------------------------------|-----------------------------------------------|
| <b>Gender</b>               | Male                         | 2125 (41.6)                                   |
|                             | Female                       | 2980 (58.4)                                   |
| <b>Age group</b>            | 18-27 years old              | 1500 (29.4)                                   |
|                             | 28-37 years old              | 1884 (36.9)                                   |
|                             | 38-47 years old              | 1059 (20.7)                                   |
|                             | Above 47 years               | 662 (13.0)                                    |
| <b>Marital status</b>       | Single                       | 1779 (34.8)                                   |
|                             | Married                      | 3107 (60.9)                                   |
|                             | Divorced                     | 219 (4.3)                                     |
| <b>Educational level</b>    | Secondary and below          | 1219 (23.9)                                   |
|                             | Diploma                      | 525 (10.3)                                    |
|                             | Bachelor                     | 2851 (55.8)                                   |
|                             | Master and PhD               | 510 (10.0)                                    |
| <b>Monthly income</b>       | Less than 3000 SR            | 2086 (40.9)                                   |
|                             | Between 3000-5999 SR         | 703 (13.8)                                    |
|                             | Between 6000-10000 SR        | 734 (14.4)                                    |
|                             | Between 11000-15000 SR       | 835 (16.4)                                    |
|                             | Between 16000-20000 SR       | 392 (7.7)                                     |
|                             | Above 20000 SR               | 355 (7.0)                                     |
| <b>Employment</b>           | Unemployed                   | 1515 (29.7)                                   |
|                             | Student                      | 695 (13.6)                                    |
|                             | Employed (public or private) | 2310 (45.2)                                   |
|                             | Entrepreneur                 | 38 (0.7)                                      |
|                             | Retired                      | 307 (6.0)                                     |
|                             | Others                       | 240 (4.7)                                     |
| <b>Geographical regions</b> | West                         | 2603 (51.0)                                   |

|                       |         |             |
|-----------------------|---------|-------------|
|                       | Middle  | 1281 (25.1) |
|                       | East    | 268 (5.2)   |
|                       | North   | 655 (12.8)  |
|                       | South   | 298 (5.8)   |
| <b>Do you live in</b> | City    | 4787 (93.8) |
|                       | Village | 318 (6.2)   |
